# Supplementary material for: Soft nanocomposites of lead bromide perovskite and polyurethane prepared via coordination chemistry for highly flexible, stable, and quaternary metal alloy-printed light emitting diodes
Source: Royal Society of Chemistry journal article supplement (doi:10.1039/d3tc04114j), 2023-12-15
Supplement: d3tc04114j1.pdf [file d3tc04114j1.pdf]

## Electronic Supplementary Information

**Soft nanocomposites of lead bromide perovskite and polyurethane prepared via coordination chemistry for highly flexible, stable, and quaternary metal alloy-printed light emitting diodes**

Ga Eun Kim, Hae-Jin Kim, Heesuk Jung, and Minwoo Park\*

G. E. Kim and Prof. M. Park

Department of Chemical and Biological Engineering  
Sookmyung Women's University, Seoul, 04310, Korea

Prof. H. -J. Kim

School of Mechanical Engineering,  
Yonsei University, Seoul, 03722, Korea

Dr. H. Jung

Advanced Photovoltaics Research Center,  
Korea Institute of Science and Technology (KIST), Seoul, 02792, Korea

\*Corresponding author: M. Park (mwpark@sm.ac.kr)

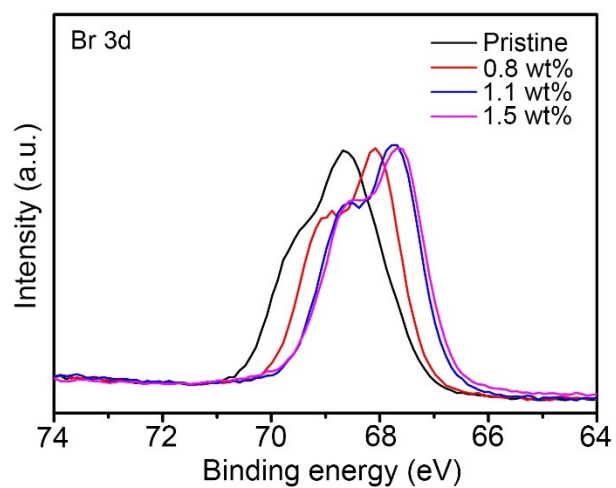

**Figure S1.** Br 3d X-ray photoelectron spectra of MAPbBr<sub>3</sub>-DMSO and MAPbBr<sub>3</sub>-PU-DMSO complex films.

**Table S1.** Time-resolved photoluminescence parameters of perovskite deposited onto glass/ITO/PEDOT:PSS substrates fitted using biexponential decay function.<sup>a)</sup>

| PU concentration [wt%] | a <sub>1</sub> | τ <sub>1</sub> [ns] | a <sub>2</sub> | τ <sub>2</sub> [ns] | τ <sub>avg</sub> [ns] <sup>b)</sup> |
|------------------------|----------------|---------------------|----------------|---------------------|-------------------------------------|
| 0                      | 0.734          | 14.03               | 0.266          | 64.23               | 27.38                               |
| 0.8                    | 0.749          | 15.94               | 0.251          | 114.1               | 40.58                               |
| 1.1                    | 0.716          | 14.98               | 0.284          | 135.6               | 49.24                               |
| 1.5                    | 0.705          | 16.67               | 0.295          | 177.4               | 64.09                               |

<sup>a)</sup> Fit function =  $a_1 e^{-t/\tau_1} + a_2 e^{-t/\tau_2}$

<sup>b)</sup>  $\tau_{avg} = (\sum_i a_i \tau_i) / (\sum_i a_i)$ , where  $\sum_i a_i = 1$

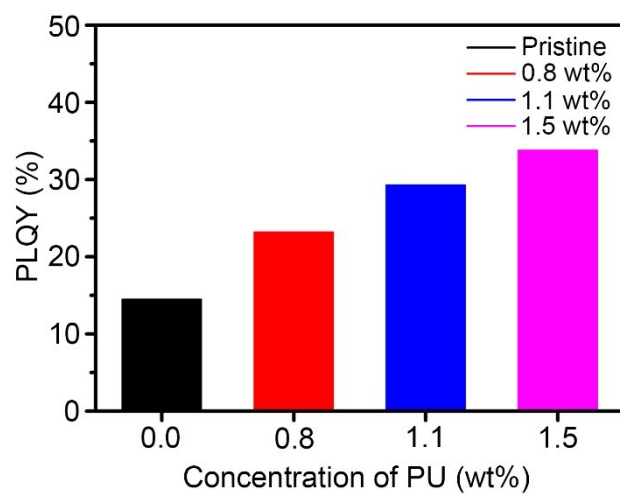

**Figure S2.** PLQYs of MAPbBr<sub>3</sub> and MAPbBr<sub>3</sub>-PU films.

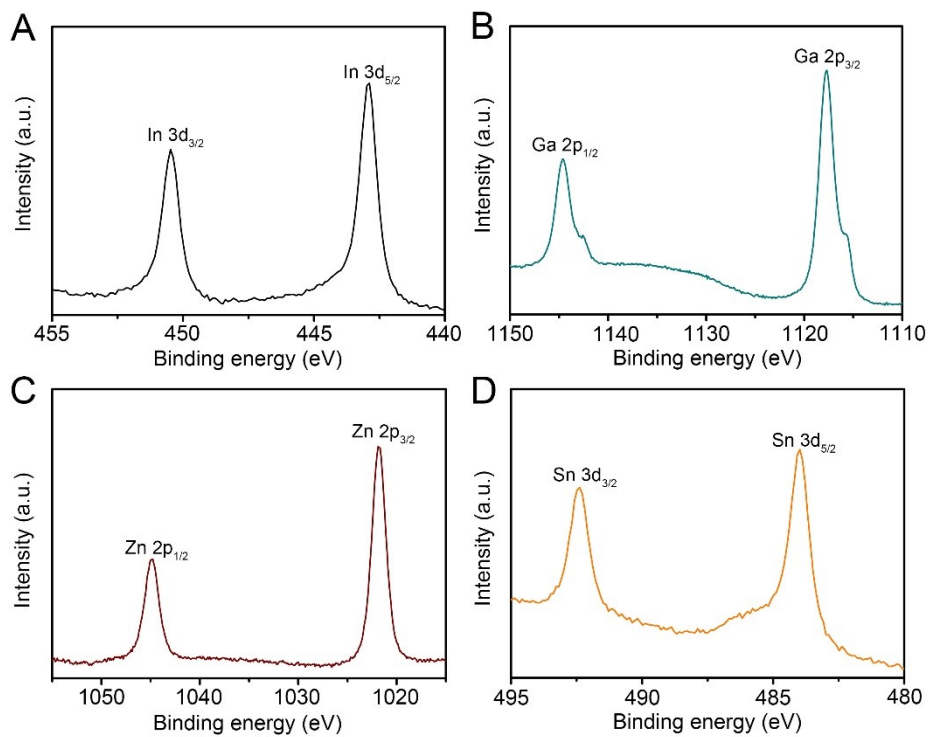

**Figure S3.** X-ray photoelectron spectra of IGZS displaying (A) In 3d, (B) Ga 2p, (C) Zn 2p, and (D) Sn 3d.

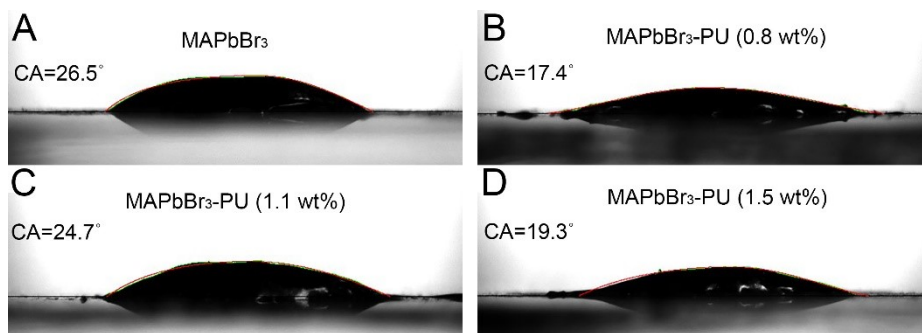

**Figure S4.** Optical microscopy images of IGZS droplets on (A) glass/ITO/PEDOT:PSS/MAPbBr<sub>3</sub>/PCBM, (B) glass/ITO/PEDOT:PSS/MAPbBr<sub>3</sub>-PU0.8/PCBM, (C) glass/ITO/PEDOT:PSS/MAPbBr<sub>3</sub>-PU1.1/PCBM, and (D) glass/ITO/PEDOT:PSS/MAPbBr<sub>3</sub>-PU1.5/PCBM.

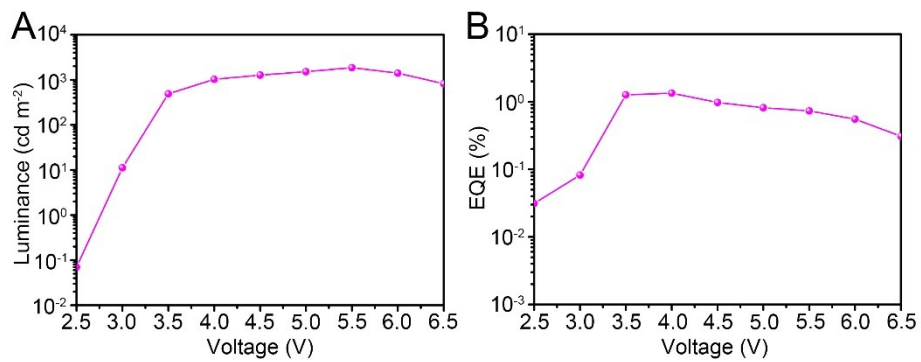

**Figure S5.** (A) Luminance–voltage and (B) EQE–voltage curves of MAPbBr<sub>3</sub>-PU1.5 device with Ag NW cathode.

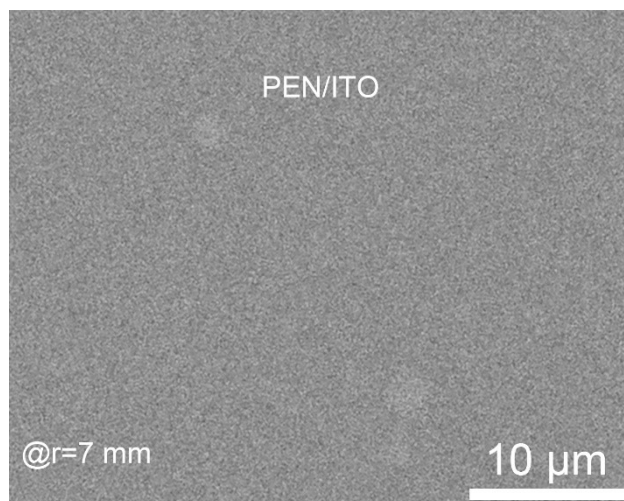

**Figure S6.** SEM image of PEN/ITO substrate at  $r = 7$  mm.



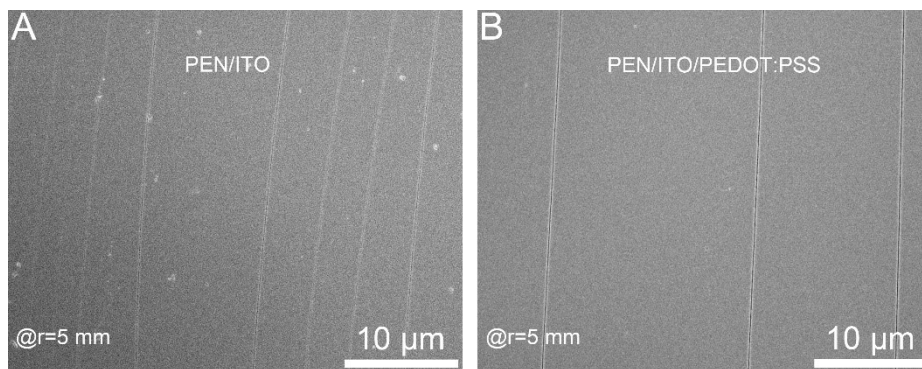

**Figure S7.** SEM images of (a) PEN/ITO and (b) PEN/ITO/PEDOT:PSS substrates at  $r = 5$  mm.

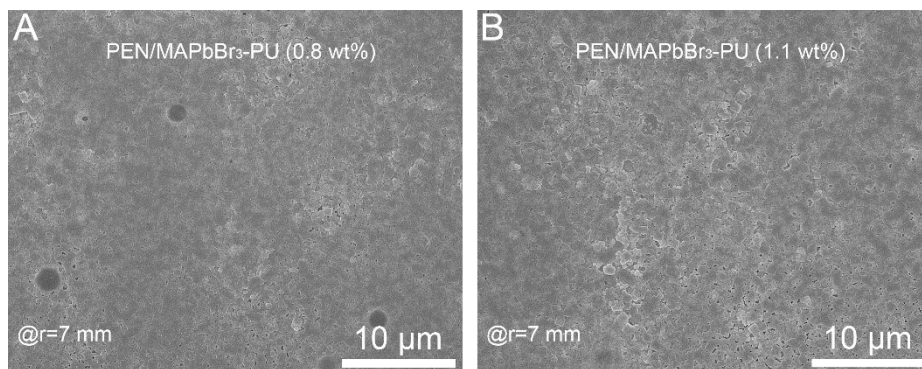

**Figure S8.** SEM images of (a) PEN/MAPbBr<sub>3</sub>-PU0.8 and (b) PEN/MAPbBr<sub>3</sub>-PU1.1 substrates at  $r = 7$  mm.

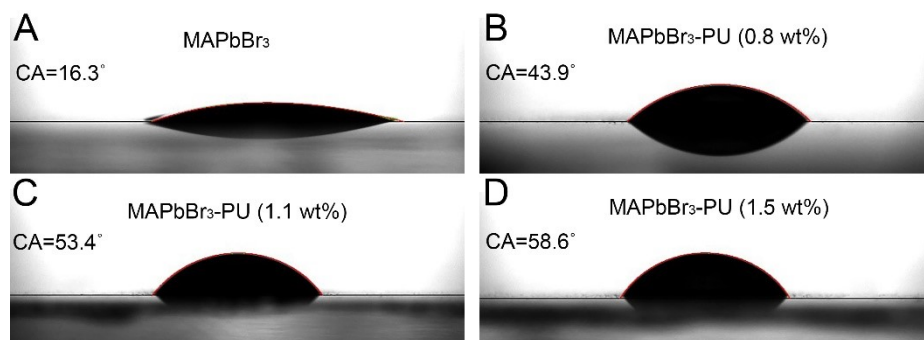

**Figure S9.** Optical microscopy images of water droplets on (A) glass/ITO/PEDOT:PSS/MAPbBr<sub>3</sub>, (B) glass/ITO/PEDOT:PSS/MAPbBr<sub>3</sub>-PU0.8, (C) glass/ITO/PEDOT:PSS/MAPbBr<sub>3</sub>-PU1.1, and (D) glass/ITO/PEDOT:PSS/MAPbBr<sub>3</sub>-PU1.5.

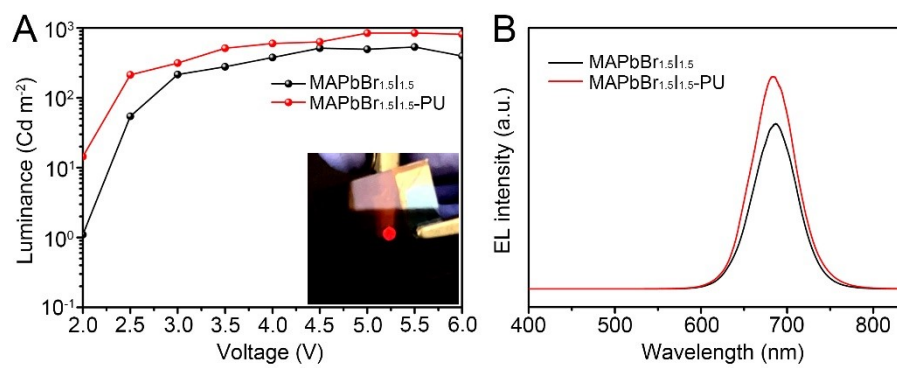

**Figure S10.** (A) Luminance-voltage and (B) EL spectra of MAPbBr<sub>1.5</sub>I<sub>1.5</sub> and MAPbBr<sub>1.5</sub>I<sub>1.5</sub>-PU devices. The inset photograph exhibits the working device at 2.5V. The EL peaks are observed at 689.4 nm.

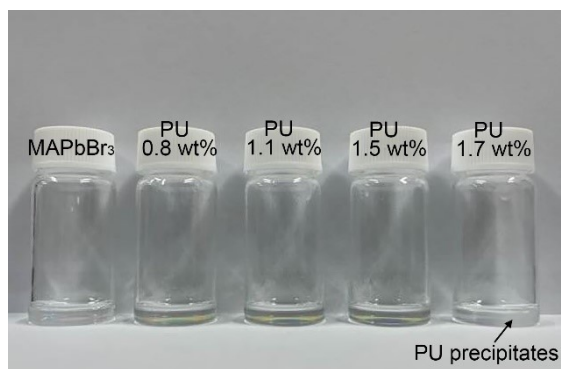

**Figure S11.** Photographs of MAPbBr<sub>3</sub> and MAPbBr<sub>3</sub>-PU (0.8, 1.1, 1.5, and 1.7 wt%) solutions.

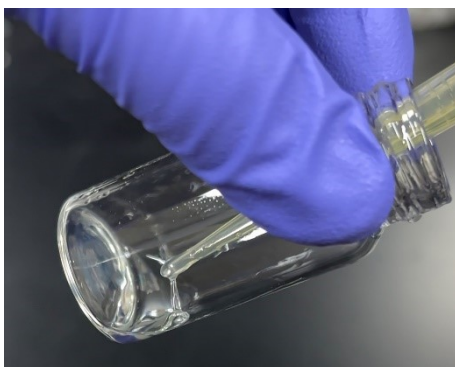

**Figure S12.** Magnified photograph of MAPbBr<sub>3</sub>-PU (1.7 wt%) solution. The PU precipitates form a large lump, separated from the solution.
